# Supplementary material
Source: PubMed Central journal article supplement (PMC3569847)

**Table S1.** Summary of isolation of influenza A viruses (H1N1 and H1N2) from swine, June 2009 to February 2010, Hong Kong

| Sampling occasion | Sample number | Influenza A positive |             |
|-------------------|---------------|----------------------|-------------|
|                   |               | H1N1/2009            | H1N1 / H1N2 |
| 11 Jun 2009       | 252           | 0                    | 1           |
| 25 Jun 2009       | 252           | 0                    | 1           |
| 9 Jul 2009        | 252           | 0                    | 0           |
| 23 Jul 2009       | 252           | 0                    | 3           |
| 13 Aug 2009       | 252           | 0                    | 7           |
| 27 Aug 2009       | 252           | 0                    | 0           |
| 10 Sep 2009       | 252           | 0                    | 0           |
| 24 Sep 2009       | 252           | 0                    | 0           |
| 8 Oct 2009        | 252           | 0                    | 0           |
| 22 Oct 2009       | 252           | 2                    | 1           |
| 5 Nov 2009        | 252           | 0                    | 2           |
| 19 Nov 2009       | 252           | 0                    | 0           |
| 3 Dec 2009        | 247           | 2                    | 3           |
| 17 Dec 2009       | 244           | 5                    | 3           |
| 7 Jan 2010        | 206           | 1                    | 1           |
| 21 Jan 2010       | 180           | 0                    | 0           |
| 4 Feb 2010        | 200           | 0                    | 0           |
| <b>TOTAL</b>      | <b>4101</b>   | <b>10</b>            | <b>22</b>   |

**Table S2.** Antigenic analysis of influenza A viruses (H1N1/H1N2) by hemagglutination inhibition test

| Serum                                                   | Antibody titers* to viral antigen     |                                        |                                              |                                        |                                        |
|---------------------------------------------------------|---------------------------------------|----------------------------------------|----------------------------------------------|----------------------------------------|----------------------------------------|
|                                                         | A/Brisbane/59/2007<br>(Seasonal H1N1) | A/California/4/2009<br>(Pandemic H1N1) | A/Sw/HK/201/2010<br>(Novel reassortant H1N1) | A/Sw/HK/NS29/2009<br>(EA lineage H1N1) | A/Sw/HK/4167/1999<br>(CS lineage H1N1) |
| Human post H1N1/2009 vaccine (Patient A)                | <10                                   | 160                                    | <10                                          | – <sup>#</sup>                         | –                                      |
| Human post H1N1/2009 vaccine (Patient B)                | 10                                    | 320                                    | 320                                          | –                                      | –                                      |
| Human post H1N1/2009 vaccine (Patient C)                | 320                                   | 80                                     | <10                                          | –                                      | –                                      |
| Human post H1N1/2009 infection (Patient D) acute        | <10                                   | <10                                    | <10                                          | –                                      | –                                      |
| Human post H1N1/2009 infection (Patient D) convalescent | <10                                   | 160                                    | 40                                           | –                                      | –                                      |
| Human post H1N1/2009 infection (Patient E) acute        | <10                                   | <10                                    | <10                                          | –                                      | –                                      |
| Human post H1N1/2009 infection (Patient E) convalescent | 20                                    | 160                                    | 10                                           | –                                      | –                                      |
| Ferret anti-A/California/4/2009 serum                   | <10                                   | <u>1280</u>                            | <10                                          | 80                                     | 2560                                   |
| Ferret anti-A/swine/Hong Kong/NS29/2009 serum           | <10                                   | 160                                    | 10240                                        | <u>5120</u>                            | 1280                                   |
| Ferret anti-A/swine/Hong Kong/4167/1999 serum           | <20                                   | 5120                                   | 160                                          | 640                                    | <u>20480</u>                           |

\*Reciprocal antibody titers are presented. <sup>#</sup>– indicates test not done. Underline text indicates homologous titers. Abbreviations: CS, classical swine; EA, European avian-like; HK, Hong Kong; Sw, swine.

**Fig. S1.** Maximum likelihood phylogenies of the **(A–H)** H1-HA, N1-NA, PB2, PB1, PA, NP, M and NS genes, respectively, of representative influenza A viruses. \* denotes phylogenetic position of the novel reassortant virus A/swine/Hong Kong/201/2010. Only bootstrap supports for major swine H1N1/H1N2 and H1N1/2009 lineages (>70%) are shown. Bar represents nucleotide substitutions per site.

Type of file: figure

Label: fig1

Filename: 1189132fig1.pdf

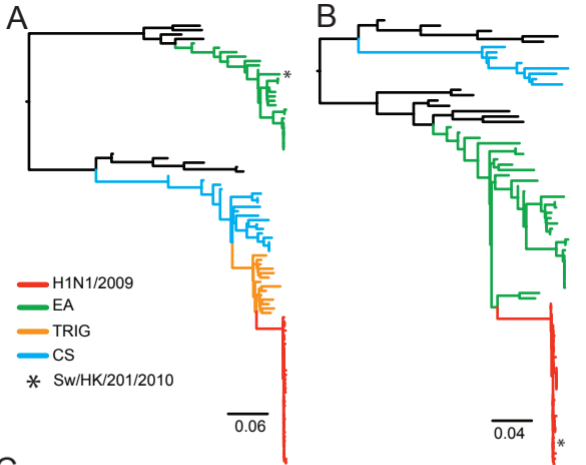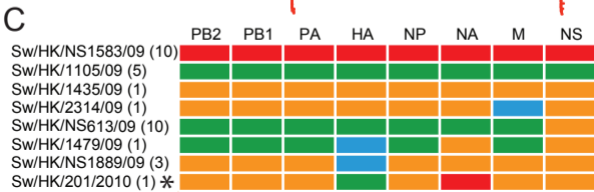

Supplement: NIHMS440159-supplement-supplement_1.pdf [file NIHMS440159-supplement-supplement_1.pdf]
